# Supplementary material
Source: PubMed Central journal article supplement (PMC6381393)
Supplement: NIHMS968999-supplement-8.pdf [file NIHMS968999-supplement-8.pdf]

## Supplementary Figure legends

**Supplementary Figure S1. Tumor growth curves for representative top hits in the screen. A,** Validation of gene overexpression for representative ORFs. Primers only detecting endogenous transcripts were designed to flank introns, where those detecting both endogenous and exogenous transcript were inside exons. **B,** Growth curves for subcutaneous tumors with earliest onset day after injection for representative genes. **C,** Validation of gene overexpression for 26 randomly selected ORFs from the 238 negative genes of the screen using qRT-PCR. Red and blue dotted lines represent 1X and 2X fold change, respectively.

**Supplementary Figure S2. PYGO2 overexpression promotes LHMK and LNCaP tumor progression. A,** Copy number-correlated *PYGO2* mRNA expression in three datasets including primary and metastatic PCa. **B,** H&E stain for representative LHMK-RFP and LHMK-PYGO2 subcutaneous tumors. Scale bar, 2mm. **C,** H&E stain for representative subcutaneous tumor and associated draining lymph node filled with metastasis, formed by LNCaP-PYGO2 cells. Scale bar, 100 $\mu$ m.

**Supplementary Figure S3. Effects of PYGO2 knockdown *in vitro* and *in vivo*. A,** Modestly reduced 2D colony formation by PYGO2 knockdown in PC3. **B,** Significantly reduced invasion by PYGO2 knockdown in PC3 cells, detected by invasion assay. **C,** H&E stain of spontaneous lung metastasis formed from subcutaneous tumors by either PC3-shControl or PC3-shPYGO2 #860. Scale bar 5mm. **D,** PYGO2 IHC staining of spontaneous lung metastasis formed from subcutaneous tumors by PC3-shControl. Scale bar 100 $\mu$ m. **E,** Expression of PYGO2 in indicated human PCa cell lines, detected by western blot. **F,** PYGO2-targeting siRNA (1:1 ratio of SASI\_Hs01\_00059021 and SASI\_Hs02\_00363399 from Sigma, delivered by MaxSuppressor In Vivo RNA-LANCER II kit) impaired tumor growth of the PDX model MDA-PCa-180. \*\*\*P < 0.001, Student's t-test.

## **Supplementary Tables**

**Supplementary Table S1.** List of primers for quantitative RT-PCR and shRNA sequences. Primers were designed to detect either endogenous transcripts only (endo), or both endogenous and ORF-expressed transcripts (endo + ORF).

**Supplementary Table S2.** List of genes generated from bioinformatics analyses and used to select ORFs for *in vivo* screen.

**Supplementary Table S3.** List of ORFs used for *in vivo* screen.

**Supplementary Table S4.** List of positive hits from the *in vivo* screen, shown by gene name, tumor incidence and first tumor onset day (post-injection).
