# Supplementary material
Source: PubMed Central journal article supplement (PMC6381393)

**A**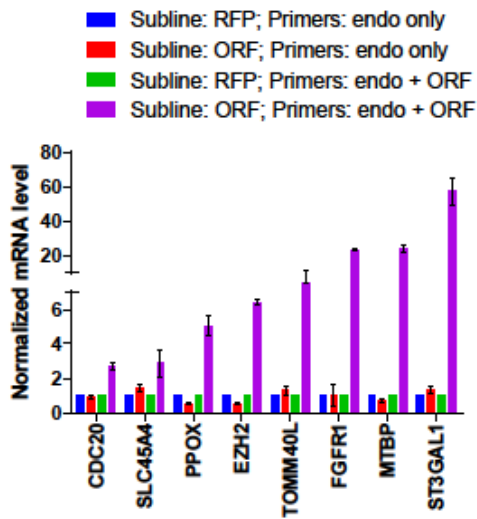**B**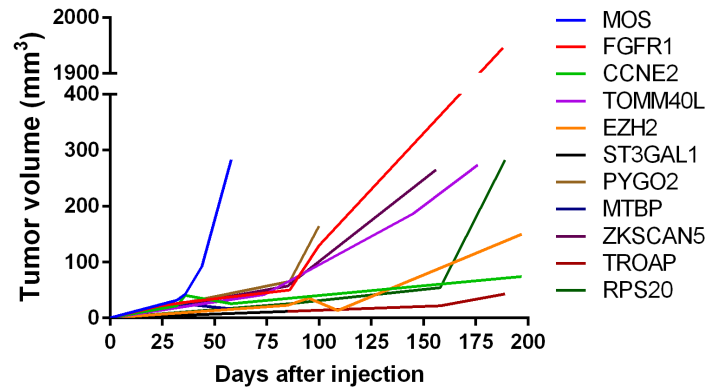**C**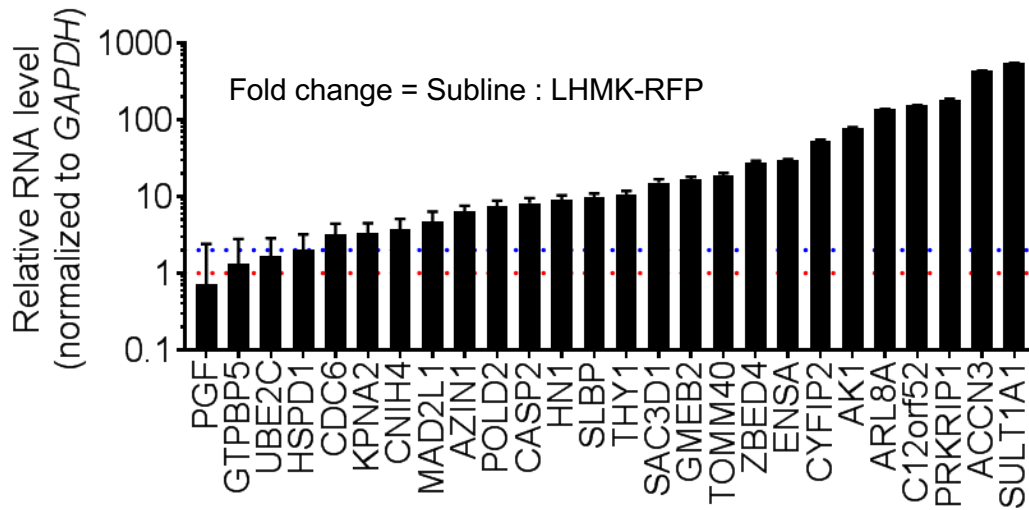**D**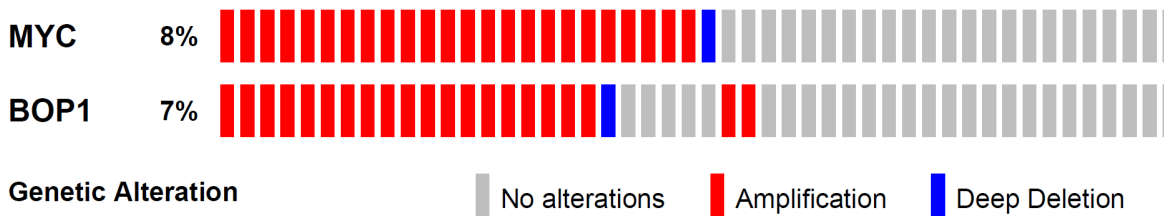

Supplement: NIHMS968999-supplement-1.pdf [file NIHMS968999-supplement-1.pdf]

**A**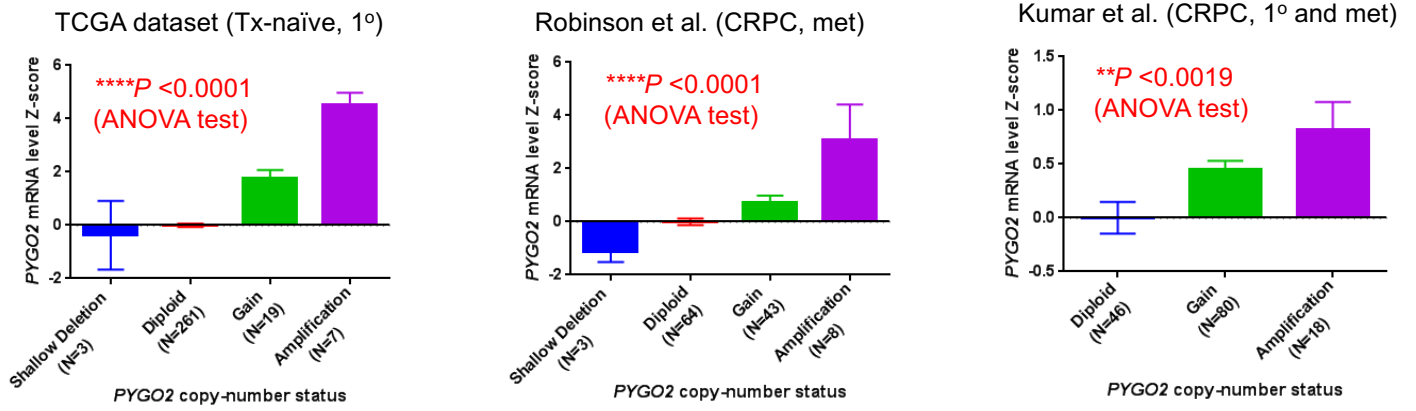**B**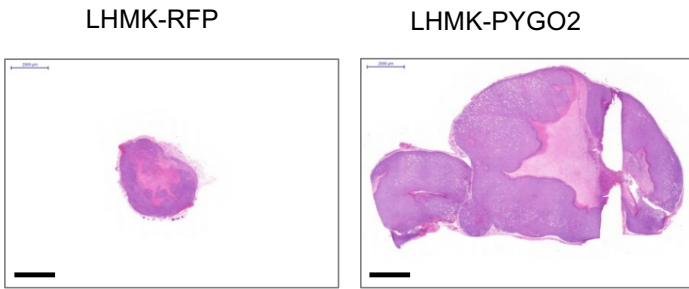**C**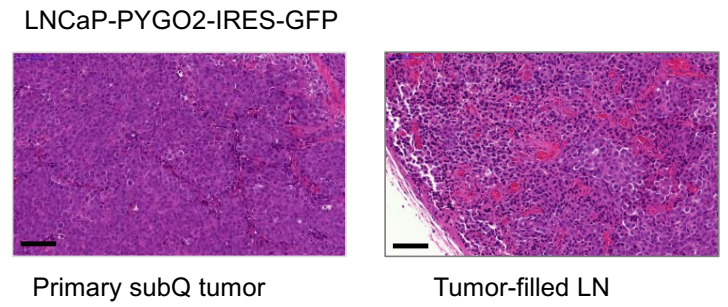

Supplement: NIHMS968999-supplement-2.pdf [file NIHMS968999-supplement-2.pdf]

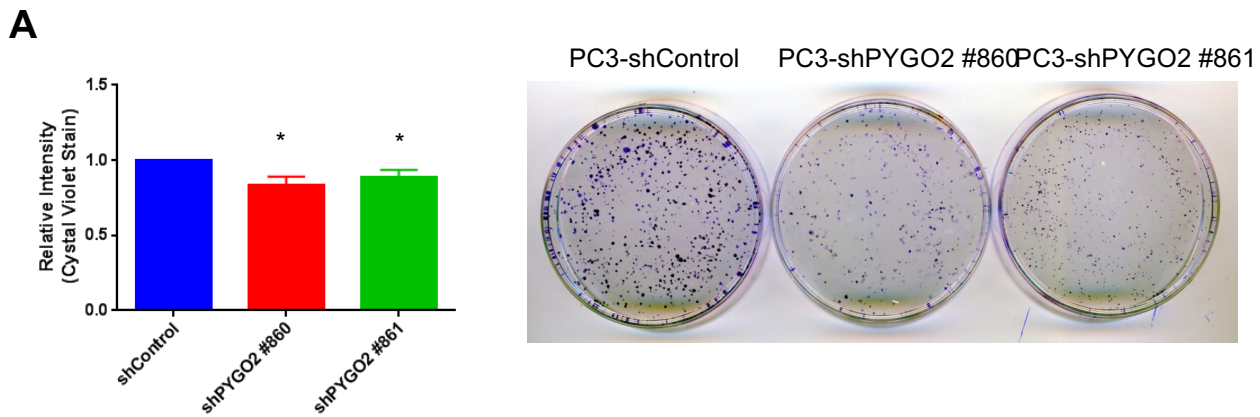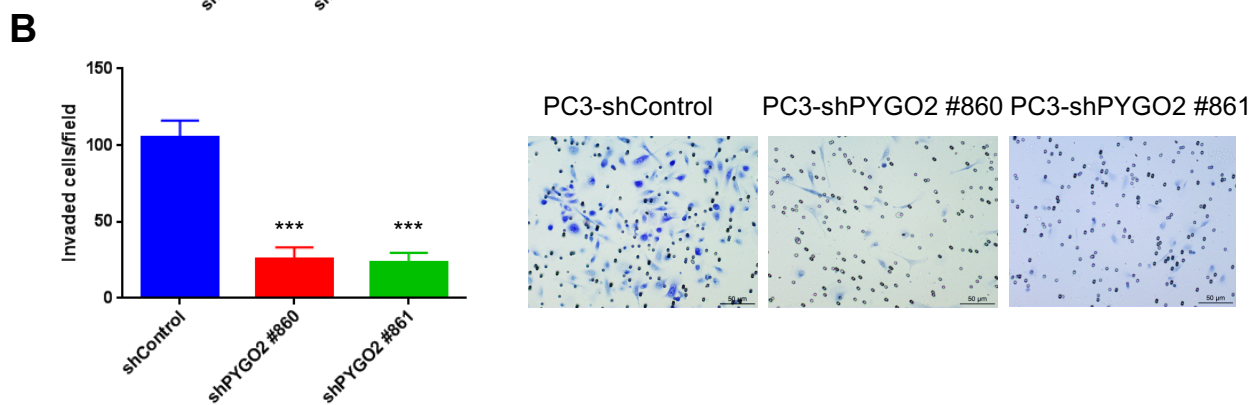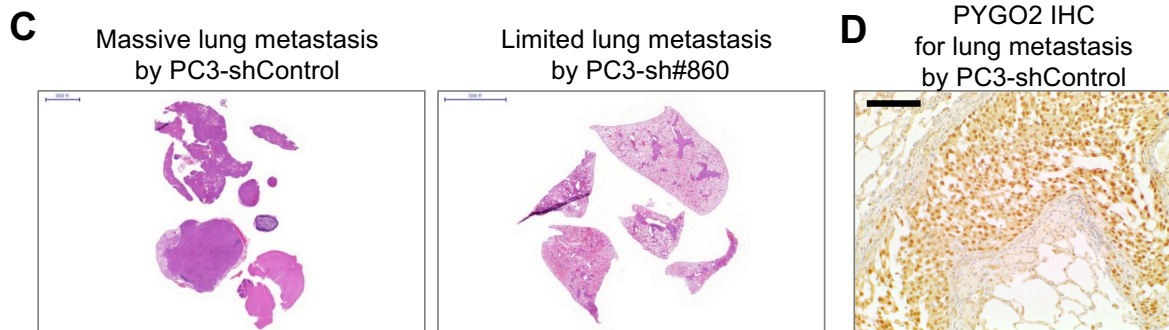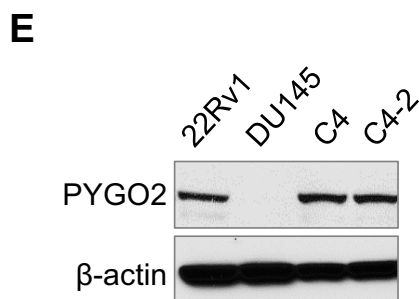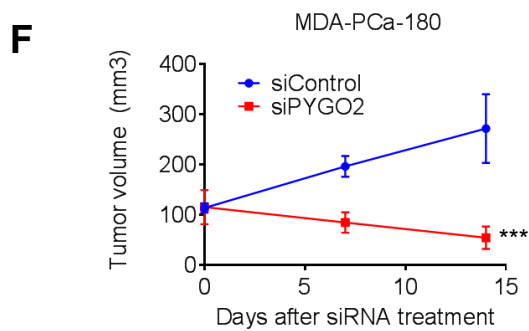

Supplement: NIHMS968999-supplement-3.pdf [file NIHMS968999-supplement-3.pdf]
